# Supplementary material for: Prediction of ternary alkaline-earth metal Sn(ii) and Pb(ii) chlorides with potential applications as p-type transparent conductors
Source: Royal Society of Chemistry journal article supplement (doi:10.1039/d4cp03090g), 2024-01-01
Supplement: d4cp03090g2.pdf [file d4cp03090g2.pdf]

Supporting Information for 'Prediction of ternary alkaline-earth metal Sn(II) and Pb(II) chlorides with potential applications as *p*-type transparent conductors'

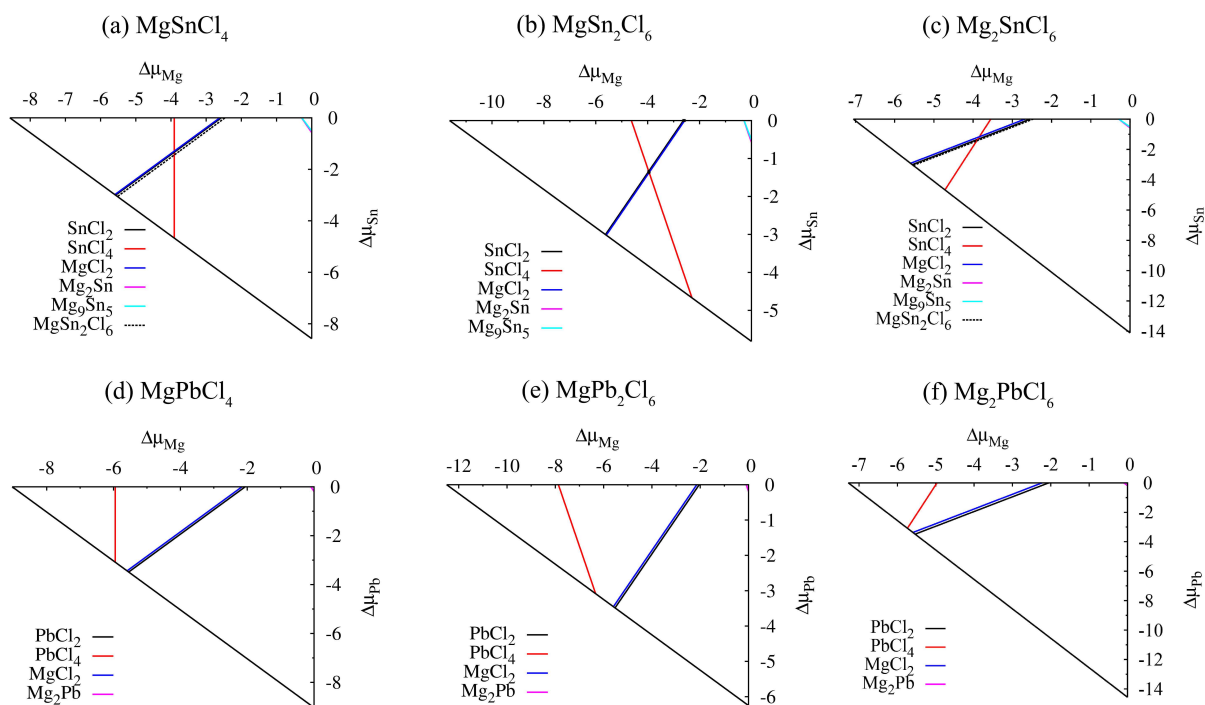

Figure S1: The entire phase stability diagrams for  $\text{MgSnCl}_4$  (a),  $\text{MgSn}_2\text{Cl}_6$  (b),  $\text{Mg}_2\text{SnCl}_6$  (c),  $\text{MgPbCl}_4$  (d),  $\text{MgPb}_2\text{Cl}_6$  (e), and  $\text{Mg}_2\text{PbCl}_6$  (f). Each line represents a known competing phase, and the stable region is indicated in green (same below). The stable chemical region exists only for  $\text{MgSn}_2\text{Cl}_6$ .

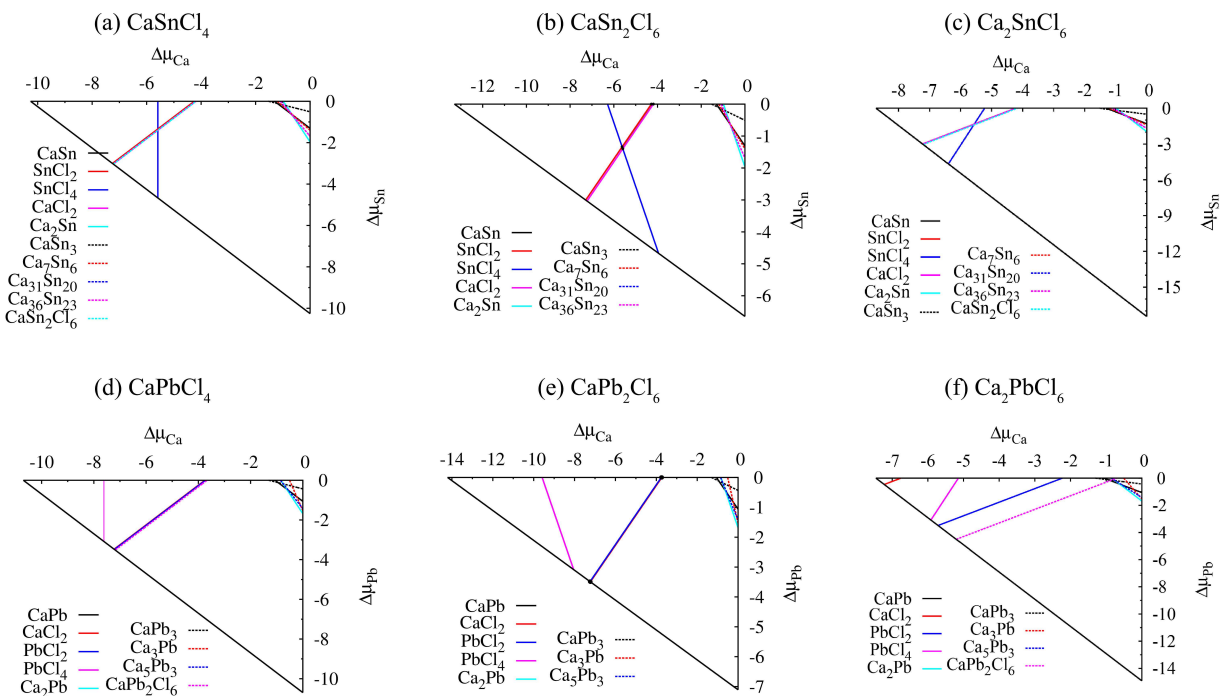

Figure S2: The entire phase stability diagrams for  $\text{CaSnCl}_4$  (a),  $\text{CaSn}_2\text{Cl}_6$  (b),  $\text{Ca}_2\text{SnCl}_6$  (c),  $\text{CaPbCl}_4$  (d),  $\text{CaPb}_2\text{Cl}_6$  (e), and  $\text{Ca}_2\text{PbCl}_6$  (f). The stable chemical region exists only for  $\text{CaSn}_2\text{Cl}_6$  and  $\text{CaPb}_2\text{Cl}_6$ .

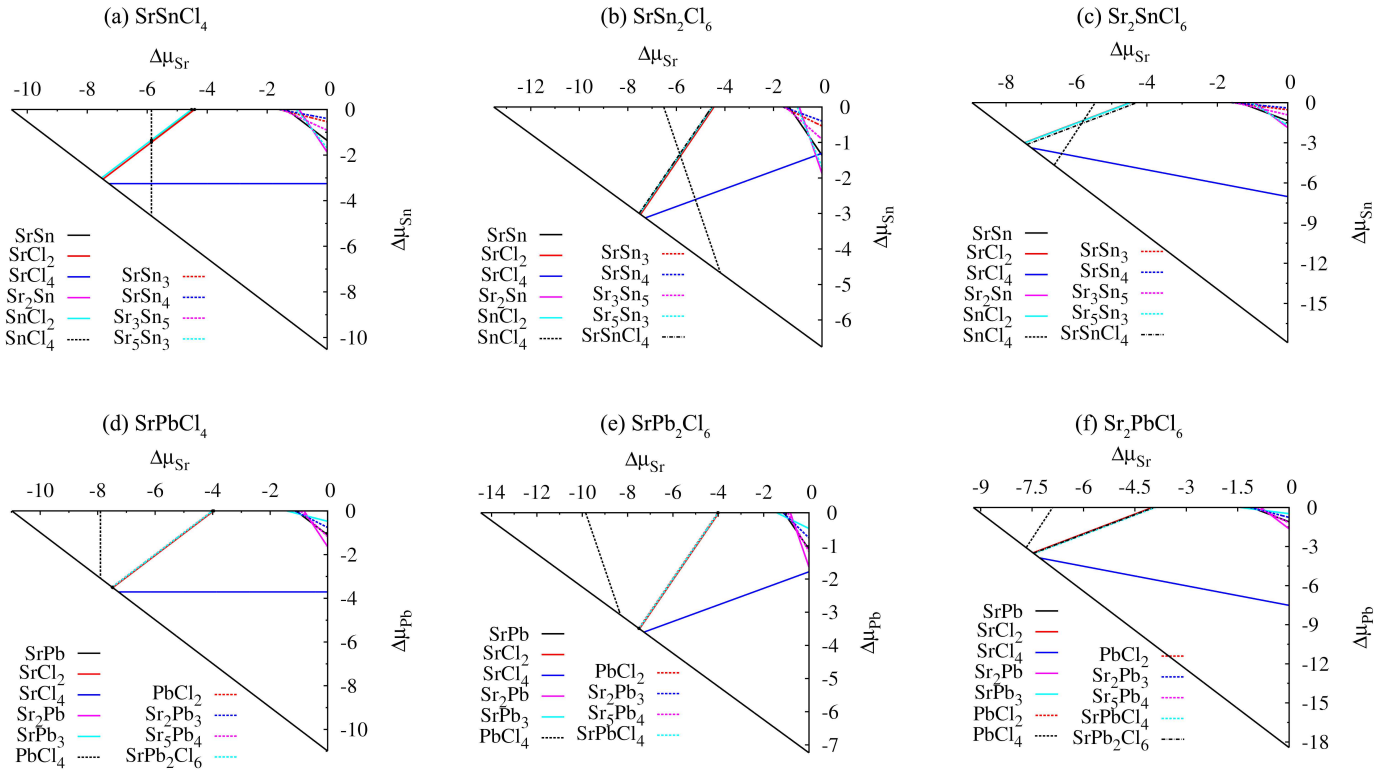

Figure S3: The entire phase stability diagrams for SrSnCl<sub>4</sub> (a), SrSn<sub>2</sub>Cl<sub>6</sub> (b), Sr<sub>2</sub>SnCl<sub>6</sub> (c), SrPbCl<sub>4</sub> (d), SrPb<sub>2</sub>Cl<sub>6</sub> (e), and Sr<sub>2</sub>PbCl<sub>6</sub> (f). The stable chemical region exists in SrSnCl<sub>4</sub>, SrPbCl<sub>4</sub> and SrPb<sub>2</sub>Cl<sub>6</sub>.

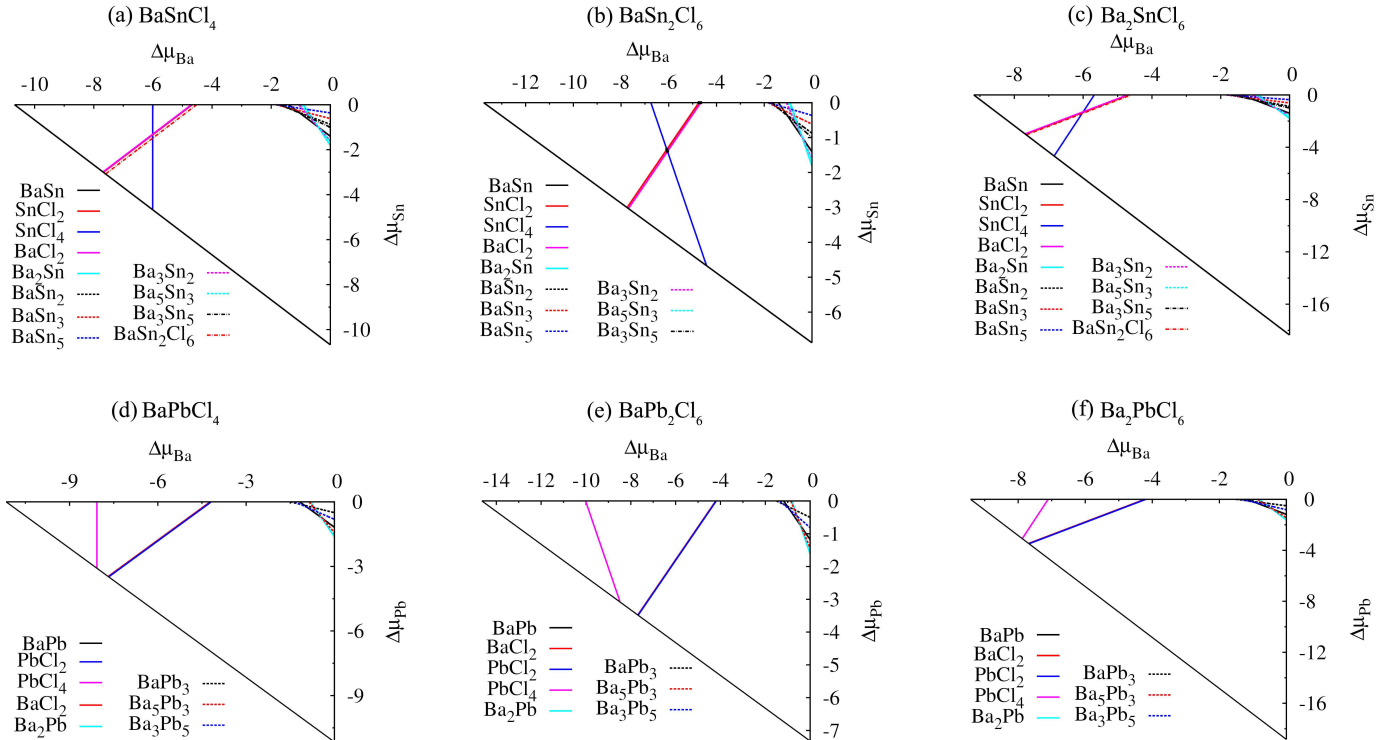

Figure S4: The entire phase stability diagrams for BaSnCl<sub>4</sub> (a), BaSn<sub>2</sub>Cl<sub>6</sub> (b), Ba<sub>2</sub>SnCl<sub>6</sub> (c), BaPbCl<sub>4</sub> (d), BaPb<sub>2</sub>Cl<sub>6</sub> (e), and Ba<sub>2</sub>PbCl<sub>6</sub> (f). The stable chemical region exists only for BaSn<sub>2</sub>Cl<sub>6</sub>.

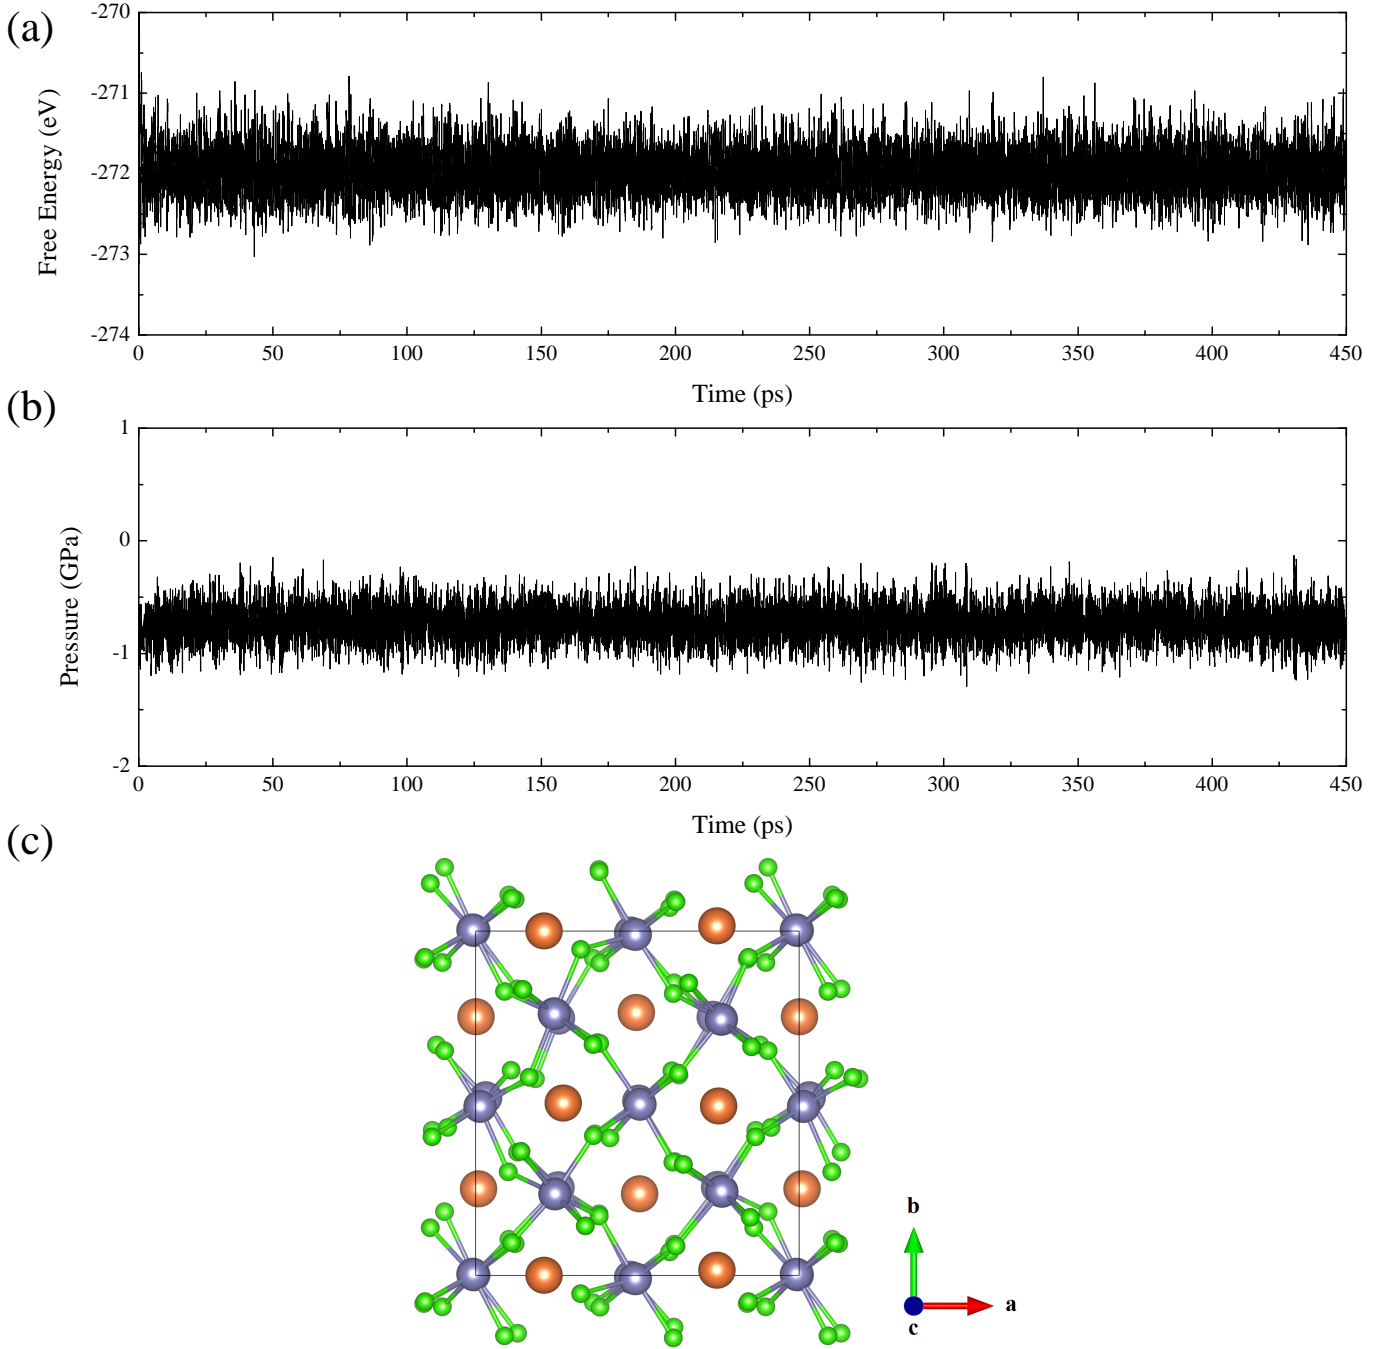

Figure S5: The free energy (a) and pressure (b) evolutions of  $\text{CaPb}_2\text{Cl}_6$  during molecular dynamics at 300 K of a 450 ps simulation are presented. The ultimate structural configuration of this evolutionary process is illustrated in (c).

Table S1: The Single Crystal Elastic Constants  $C_{ij}$  (in GPa) of  $P2_1/c\text{-MgSn}_2\text{Cl}_6$ ,  $P2_1/c\text{-CaSn}_2\text{Cl}_6$ ,  $Pnmm\text{-CaPb}_2\text{Cl}_6$ ,  $P2_12_12_1\text{-SrSnCl}_4$ ,  $P2_12_12_1\text{-SrPbCl}_4$ ,  $P2_1/m\text{-SrPb}_2\text{Cl}_6$ , and  $P2_1/m\text{-BaSn}_2\text{Cl}_6$ . The strikethrough indicates that there is no this constant.

| Structure                         | $C_{11}$ | $C_{12}$ | $C_{13}$ | $C_{15}$ | $C_{22}$ | $C_{23}$ | $C_{25}$ | $C_{33}$ | $C_{35}$ | $C_{44}$ | $C_{46}$ | $C_{55}$ | $C_{66}$ | Mechanically stability |
|-----------------------------------|----------|----------|----------|----------|----------|----------|----------|----------|----------|----------|----------|----------|----------|------------------------|
| $P2_1/c\text{-MgSn}_2\text{Cl}_6$ | 29.35    | 4.71     | 3.93     | 4.32     | 13.14    | 7.27     | 2.57     | 14.52    | 2.93     | 9.59     | 0.96     | 4.06     | 5.66     |                        |
| $P2_1/c\text{-CaSn}_2\text{Cl}_6$ | 34.32    | 9.12     | 7.14     | -2.08    | 14.93    | 6.87     | -1.73    | 13.49    | -4.49    | 10.29    | 1.25     | 8.00     | 6.14     |                        |
| $Pnmm\text{-CaPb}_2\text{Cl}_6$   | 12.27    | 12.12    | 15.42    | -        | 38.15    | 17.30    | -        | 32.98    | -        | 7.46     | -        | 3.41     | 5.58     |                        |
| $P2_12_12_1\text{-SrSnCl}_4$      | 30.80    | 15.31    | 14.59    | -        | 24.01    | 10.15    | -        | 31.59    | -        | 6.87     | -        | 12.85    | 10.45    | stable                 |
| $P2_12_12_1\text{-SrPbCl}_4$      | 41.60    | 22.08    | 20.30    | -        | 24.42    | 12.61    | -        | 36.08    | -        | 6.88     | -        | 13.66    | 12.29    |                        |
| $P2_1/m\text{-SrPb}_2\text{Cl}_6$ | 36.16    | 17.97    | 19.04    | 2.07     | 34.49    | 15.80    | -0.31    | 40.83    | 1.11     | 11.64    | 2.68     | 6.09     | 11.16    |                        |
| $P2_1/m\text{-BaSn}_2\text{Cl}_6$ | 14.41    | 8.32     | 5.49     | -0.83    | 26.89    | 6.87     | 1.44     | 16.86    | 1.28     | 1.25     | 0.72     | 4.78     | 5.48     |                        |

### (a) Young's modulus

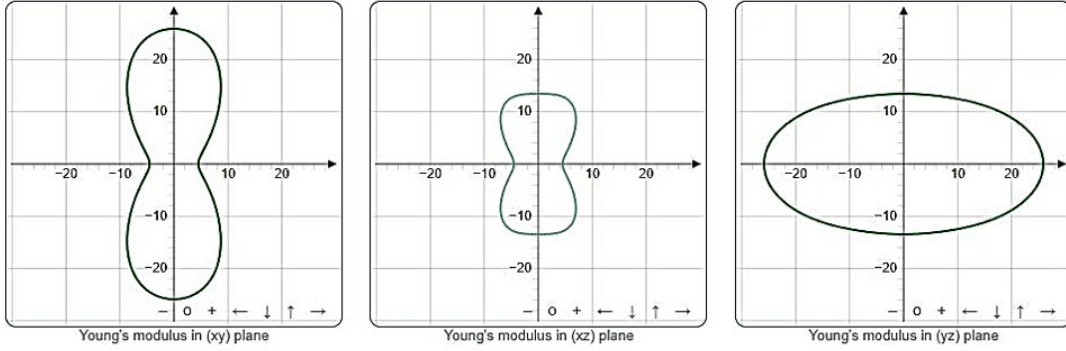

### (b) Compressibility

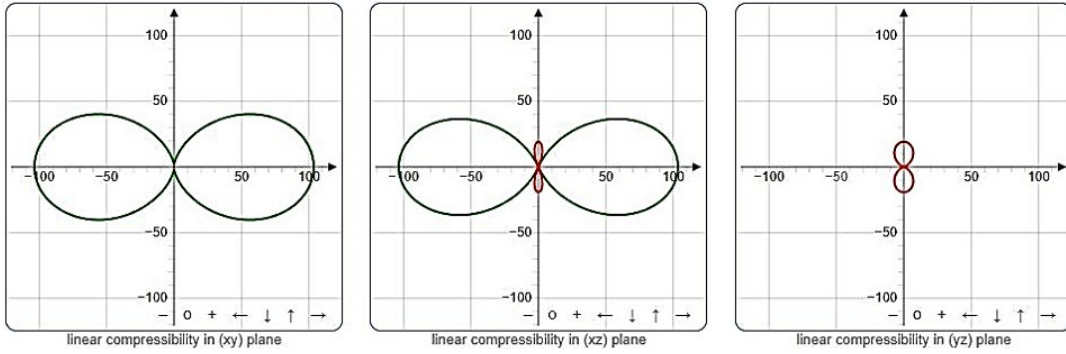

### (c) Shear modulus

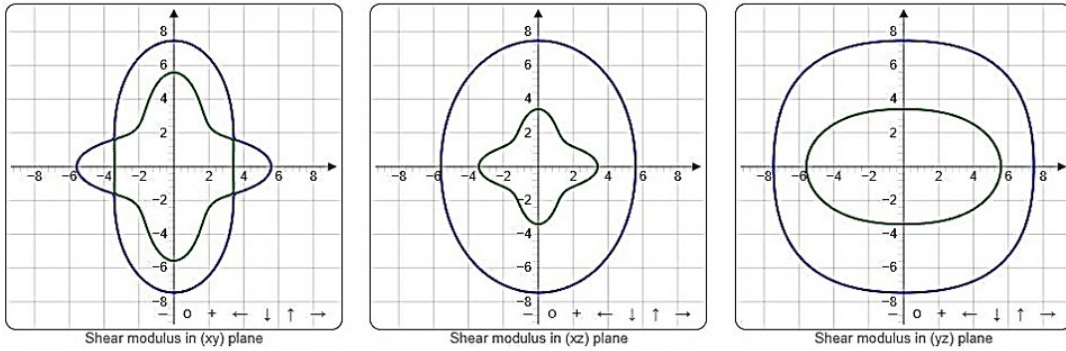

### (d) Poisson's ratio

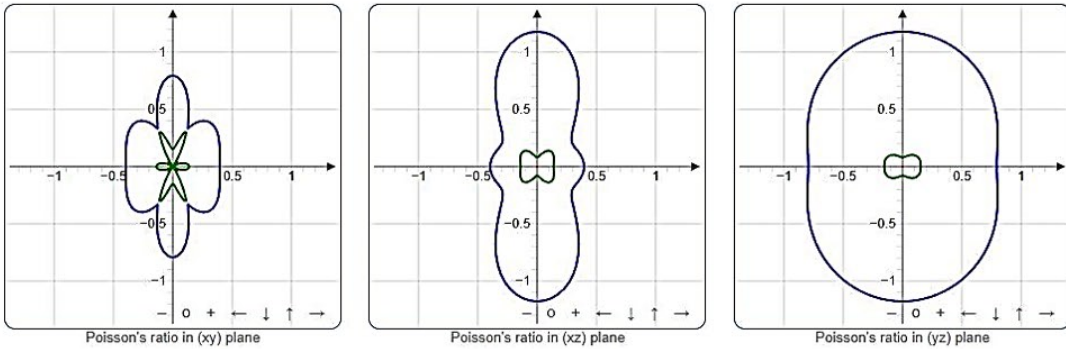

Figure S6: Two-dimensional (2D) plots of Young's moduli (a), compressibility (b), Shear moduli (c) and Poisson ratios (d) of  $\text{CaPb}_2\text{Cl}_6$  at 0GPa. The green line and red line in (b) show the positive and negative values, respectively.

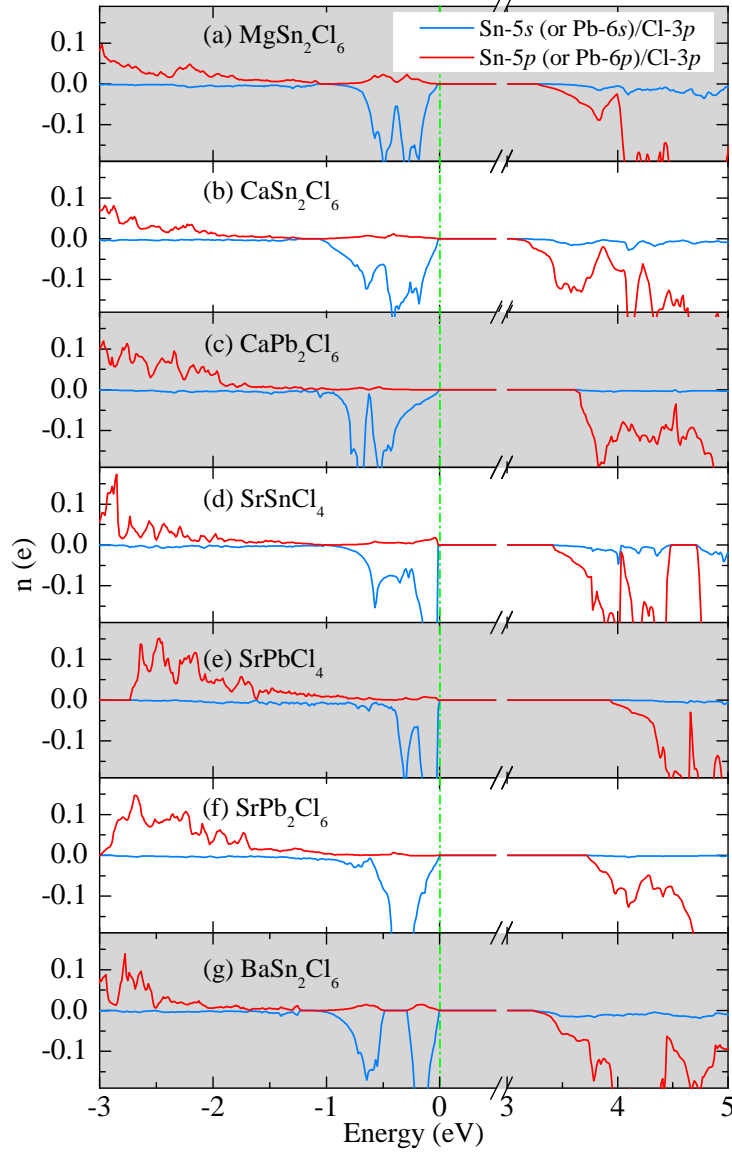

Figure S7: Crystal orbital overlap population (COOP) between the Sn-5s (or Pb-6s) and Cl-3p orbitals (blue lines), and the Sn-5p (or Pb-6p) and Cl-3p orbitals (red lines) for MgSn<sub>2</sub>Cl<sub>6</sub> (a), CaSn<sub>2</sub>Cl<sub>6</sub> (b), CaPb<sub>2</sub>Cl<sub>6</sub> (c), SrSnCl<sub>4</sub> (d), SrPbCl<sub>4</sub> (e), SrPb<sub>2</sub>Cl<sub>6</sub> (f), and BaSn<sub>2</sub>Cl<sub>6</sub> (g). Positive  $n(e)$  represents bonding states and negative  $n(e)$  represents antibonding ones. The VBM is set to energy zero. (dash dot line).

The 2D plots of elastic properties of CaPb<sub>2</sub>Cl<sub>6</sub> obtained using the online tool ELATE<sup>1</sup> are depicted in Figure S5. Table S3 provides a summary of the variations in elastic moduli with respect to different crystallographic directions. As illustrated in Figure S5 and Table S2, CaPb<sub>2</sub>Cl<sub>6</sub> exhibits a notable anisotropy in Young's moduli and shear moduli, with even negative values observed for compressibility and Poisson ratios. The distinctive wine-rack-like structure in the CaPb<sub>2</sub>Cl<sub>6</sub> crystal is responsible for the observed anisotropy and negative values of elastic properties.

## References

- [1] R. Gaillac, P. Pullumbi and F.-X. Coudert, *J. Phys.: Condens. Matter*, 2016, **28**, 275201.

Table S2: Structural data for the structures of MgSnCl<sub>4</sub>, Mg<sub>2</sub>SnCl<sub>6</sub>, MgPbCl<sub>4</sub>, MgPb<sub>2</sub>Cl<sub>6</sub>, Mg<sub>2</sub>PbCl<sub>6</sub>, CaSnCl<sub>4</sub>, Ca<sub>2</sub>SnCl<sub>6</sub>, CaPbCl<sub>4</sub>, Ca<sub>2</sub>PbCl<sub>6</sub>, SrSn<sub>2</sub>Cl<sub>6</sub>, Sr<sub>2</sub>SnCl<sub>6</sub>, Sr<sub>2</sub>PbCl<sub>6</sub>, BaSnCl<sub>4</sub>, Ba<sub>2</sub>SnCl<sub>6</sub>, BaPbCl<sub>4</sub>, BaPb<sub>2</sub>Cl<sub>6</sub>, and Ba<sub>2</sub>PbCl<sub>6</sub> identified from our structure predictions. *Aea2*-BaPb<sub>2</sub>Cl<sub>6</sub> and *Pbcn*-BaPb<sub>2</sub>Cl<sub>6</sub> have indistinguishable enthalpy and are both listed.

| Space group and pressure                                                  | Lattice parameters (Å)                                                  | Wyckoff positions | Atoms                                                    | x                                                                       | y      | z      | Space group and pressure                                                  | Lattice parameters (Å)                                                                                                       | Wyckoff positions                                        | Atoms                                                                     | x                                             | y                                                                         | z                                             |        |        |        |
|---------------------------------------------------------------------------|-------------------------------------------------------------------------|-------------------|----------------------------------------------------------|-------------------------------------------------------------------------|--------|--------|---------------------------------------------------------------------------|------------------------------------------------------------------------------------------------------------------------------|----------------------------------------------------------|---------------------------------------------------------------------------|-----------------------------------------------|---------------------------------------------------------------------------|-----------------------------------------------|--------|--------|--------|
| MgSnCl <sub>4</sub><br><i>Pnma</i>                                        | $a = 8.5908$<br>$b = 7.4541$<br>$c = 11.3987$                           | 4b                | Mg                                                       | 0.0000                                                                  | 0.5000 | 0.5000 | Sr <sub>2</sub> SnCl <sub>6</sub><br><i>P-1</i>                           | $a = 7.2410$<br>$b = 7.5060$<br>$c = 10.8994$<br>$\alpha = 90.68^\circ$<br>$\beta = 104.02^\circ$<br>$\gamma = 102.84^\circ$ | 2i                                                       | Sr1                                                                       | 0.2710                                        | 0.7007                                                                    | 0.9725                                        |        |        |        |
|                                                                           |                                                                         | 4c                | Sn                                                       | 0.3145                                                                  | 0.7500 | 0.6936 |                                                                           |                                                                                                                              |                                                          | Sr2                                                                       | 0.8398                                        | 0.8187                                                                    | 0.3083                                        |        |        |        |
|                                                                           |                                                                         | 8d                | Cl1                                                      | 0.1839                                                                  | 0.7500 | 0.4542 |                                                                           |                                                                                                                              |                                                          | Cl1                                                                       | 0.7657                                        | 0.0487                                                                    | 0.5133                                        |        |        |        |
|                                                                           |                                                                         |                   | Cl2                                                      | 0.8059                                                                  | 0.7500 | 0.5604 |                                                                           |                                                                                                                              |                                                          | Cl2                                                                       | 0.2385                                        | 0.4335                                                                    | 0.4927                                        |        |        |        |
| Mg <sub>2</sub> SnCl <sub>6</sub><br><i>Pca2</i> <sub>1</sub>             | $a = 7.1637$<br>$b = 18.9368$<br>$c = 6.5831$                           | 4a                | Cl3                                                      | 0.8975                                                                  | 0.5023 | 0.2932 |                                                                           |                                                                                                                              |                                                          | Cl3                                                                       | 0.4692                                        | 0.0052                                                                    | 0.8347                                        |        |        |        |
|                                                                           |                                                                         |                   | Mg1                                                      | 0.8885                                                                  | 0.7255 | 0.7133 |                                                                           |                                                                                                                              |                                                          | Cl4                                                                       | 0.9560                                        | 0.8630                                                                    | 0.8102                                        |        |        |        |
|                                                                           |                                                                         |                   | Mg2                                                      | 0.8850                                                                  | 0.4252 | 0.7113 |                                                                           |                                                                                                                              | Cl5                                                      | 0.5134                                                                    | 0.5031                                        | 0.1660                                                                    |                                               |        |        |        |
|                                                                           |                                                                         |                   | Sn                                                       | 0.9308                                                                  | 0.1063 | 0.6499 |                                                                           |                                                                                                                              | Cl6                                                      | 0.9863                                                                    | 0.3655                                        | 0.8550                                                                    |                                               |        |        |        |
|                                                                           |                                                                         |                   | Cl1                                                      | 0.1411                                                                  | 0.9700 | 0.5018 |                                                                           |                                                                                                                              | SrPbCl <sub>6</sub><br><i>P2</i> <sub>1</sub> / <i>m</i> | 4f<br>2e<br>4f<br>2e                                                      | Sr                                            | 0.6731                                                                    | 0.0832                                        | 0.2804 |        |        |
|                                                                           |                                                                         |                   | Cl2                                                      | 0.6759                                                                  | 0.8031 | 0.9157 |                                                                           |                                                                                                                              |                                                          |                                                                           | Pb                                            | 0.6683                                                                    | 0.7500                                        | 0.2654 |        |        |
| Cl3                                                                       | 0.1328                                                                  | 0.5033            | 0.8828                                                   | Cl1                                                                     | 0.2411 | 0.4149 |                                                                           |                                                                                                                              |                                                          |                                                                           | 0.9331                                        |                                                                           |                                               |        |        |        |
| Cl4                                                                       | 0.1200                                                                  | 0.3438            | 0.5496                                                   | Cl2                                                                     | 0.7636 | 0.9191 |                                                                           |                                                                                                                              |                                                          |                                                                           | 0.5571                                        |                                                                           |                                               |        |        |        |
| MgPbCl <sub>4</sub><br><i>Pbcn</i>                                        | $a = 6.4840$<br>$b = 15.6617$<br>$c = 6.5518$                           | 4c<br>8d          | Cl5                                                      | 0.1263                                                                  | 0.6463 | 0.5385 | Cl3                                                                       | 0.2342                                                                                                                       | 0.7500                                                   | 0.4461                                                                    |                                               |                                                                           |                                               |        |        |        |
|                                                                           |                                                                         |                   | Cl6                                                      | 0.6625                                                                  | 0.1939 | 0.8134 | Cl4                                                                       | 0.7596                                                                                                                       | 0.2500                                                   | 0.0668                                                                    |                                               |                                                                           |                                               |        |        |        |
|                                                                           |                                                                         |                   | Mg                                                       | 0.0000                                                                  | 0.9388 | 0.2500 | BaSnCl <sub>4</sub><br><i>P2</i> <sub>1</sub> / <i>c</i>                  | 4e                                                                                                                           | Ba                                                       | 0.1399                                                                    | 0.6350                                        | 0.3775                                                                    |                                               |        |        |        |
|                                                                           |                                                                         |                   | Pb                                                       | 0.0000                                                                  | 0.6735 | 0.2500 |                                                                           |                                                                                                                              | Sn                                                       | 0.4910                                                                    | 0.0714                                        | 0.6993                                                                    |                                               |        |        |        |
| Cl1                                                                       | 0.7816                                                                  | 0.9518            | 0.5632                                                   | Cl1                                                                     | 0.3713 | 0.3645 |                                                                           |                                                                                                                              | 0.3619                                                   |                                                                           |                                               |                                                                           |                                               |        |        |        |
| Cl2                                                                       | 0.7757                                                                  | 0.1803            | 0.6066                                                   | Cl2                                                                     | 0.7834 | 0.0378 |                                                                           |                                                                                                                              | 0.6308                                                   |                                                                           |                                               |                                                                           |                                               |        |        |        |
| MgPb <sub>2</sub> Cl <sub>6</sub><br><i>Pmmn</i>                          | $a = 11.6045$<br>$b = 7.0624$<br>$c = 6.9806$                           | 2a                | Mg                                                       | 0.0000                                                                  | 0.0000 | 0.0000 | Ba <sub>2</sub> SnCl <sub>6</sub><br><i>Pca</i> <sub>2</sub> <sub>1</sub> | $a = 7.3463$<br>$b = 21.5074$<br>$c = 7.4150$                                                                                | 4a                                                       | Cl1                                                                       | 0.2337                                        | 0.7889                                                                    | 0.6571                                        |        |        |        |
|                                                                           |                                                                         | 4f                | Pb                                                       | 0.3107                                                                  | 0.5000 | 0.0000 |                                                                           |                                                                                                                              |                                                          | Cl2                                                                       | 0.7601                                        | 0.5986                                                                    | 0.3982                                        |        |        |        |
|                                                                           |                                                                         | 4g                | Cl1                                                      | 0.0000                                                                  | 0.8080 | 0.3058 |                                                                           |                                                                                                                              |                                                          | Cl3                                                                       | 0.2337                                        | 0.7889                                                                    | 0.6571                                        |        |        |        |
|                                                                           |                                                                         | 8h                | Cl2                                                      | 0.6536                                                                  | 0.7100 | 0.3512 |                                                                           |                                                                                                                              |                                                          | Cl4                                                                       | 0.7601                                        | 0.5986                                                                    | 0.3982                                        |        |        |        |
| Mg <sub>2</sub> PbCl <sub>6</sub><br><i>P-31m</i>                         | $a = 6.5393$<br>$c = 6.2576$                                            | 2d                | Mg                                                       | 0.3333                                                                  | 0.6667 | 0.5000 | Ba <sub>2</sub> PbCl <sub>6</sub><br><i>Aea</i> <sub>2</sub>              | $a = 21.2630$<br>$b = 7.2840$<br>$c = 7.3463$                                                                                | 4a                                                       | Ba1                                                                       | 0.4945                                        | 0.7589                                                                    | 0.6756                                        |        |        |        |
|                                                                           |                                                                         | 1a                | Pb                                                       | 0.0000                                                                  | 0.0000 | 0.0000 |                                                                           |                                                                                                                              |                                                          | Ba2                                                                       | 0.5023                                        | 0.5864                                                                    | 0.1857                                        |        |        |        |
|                                                                           |                                                                         | 6k                | Cl                                                       | 0.0000                                                                  | 0.6364 | 0.2739 |                                                                           |                                                                                                                              |                                                          | Sn                                                                        | 0.0200                                        | 0.9269                                                                    | 0.7341                                        |        |        |        |
|                                                                           |                                                                         |                   | Ca                                                       | 0.6221                                                                  | 0.0074 | 0.1746 |                                                                           |                                                                                                                              |                                                          | Cl1                                                                       | 0.3104                                        | 0.8527                                                                    | 0.9735                                        |        |        |        |
| Sn                                                                        | 0.8644                                                                  |                   | 0.0258                                                   | 0.8646                                                                  | Cl2    | 0.2486 |                                                                           |                                                                                                                              |                                                          | 0.0313                                                                    | 0.0228                                        |                                                                           |                                               |        |        |        |
| Cl1                                                                       | 0.5509                                                                  |                   | 0.8003                                                   | 0.8736                                                                  | Cl3    | 0.2492 |                                                                           |                                                                                                                              |                                                          | 0.6743                                                                    | 0.9275                                        |                                                                           |                                               |        |        |        |
| CaSnCl <sub>4</sub><br><i>P2</i> <sub>1</sub> / <i>c</i>                  | $a = 13.9790$<br>$b = 6.7483$<br>$c = 7.6337$<br>$\beta = 93.62^\circ$  | 4e                | Cl2                                                      | 0.7027                                                                  | 0.2844 | 0.9581 |                                                                           |                                                                                                                              | Cl4                                                      | 0.2487                                                                    | 0.5011                                        | 0.4359                                                                    |                                               |        |        |        |
|                                                                           |                                                                         |                   | Cl3                                                      | 0.7930                                                                  | 0.6786 | 0.6265 |                                                                           |                                                                                                                              | Cl5                                                      | 0.8532                                                                    | 0.8215                                        | 0.8106                                                                    |                                               |        |        |        |
|                                                                           |                                                                         |                   | Cl4                                                      | 0.0229                                                                  | 0.7736 | 0.9000 |                                                                           |                                                                                                                              | Cl6                                                      | 0.7562                                                                    | 0.6711                                        | 0.4372                                                                    |                                               |        |        |        |
|                                                                           |                                                                         |                   | Ca1                                                      | 0.9003                                                                  | 0.7402 | 0.7022 |                                                                           |                                                                                                                              | Ba                                                       | 0.3703                                                                    | 0.5016                                        | 0.7208                                                                    |                                               |        |        |        |
| Ca <sub>2</sub> SnCl <sub>6</sub><br><i>Pca</i> <sub>2</sub> <sub>1</sub> | $a = 7.6735$<br>$b = 19.8135$<br>$c = 7.0485$                           | 4a                | Ca2                                                      | 0.8992                                                                  | 0.4205 | 0.7025 |                                                                           |                                                                                                                              | BaPbCl <sub>4</sub><br><i>P2</i> <sub>1</sub> / <i>c</i> | $a = 14.3632$<br>$b = 7.3183$<br>$c = 7.3718$<br>$\beta = 94.70^\circ$    | 4e                                            | Pb                                                                        | 0.8914                                        | 0.4634 | 0.7443 |        |
|                                                                           |                                                                         |                   | Sn                                                       | 0.9108                                                                  | 0.0952 | 0.6867 |                                                                           |                                                                                                                              |                                                          |                                                                           |                                               | Cl1                                                                       | 0.7327                                        | 0.6648 | 0.6384 |        |
|                                                                           |                                                                         |                   | Cl1                                                      | 0.1476                                                                  | 0.9776 | 0.5100 | Cl2                                                                       | 0.4946                                                                                                                       |                                                          |                                                                           |                                               | 0.7464                                                                    | 0.9911                                        |        |        |        |
|                                                                           |                                                                         |                   | Cl2                                                      | 0.6644                                                                  | 0.8199 | 0.8950 | Cl3                                                                       | 0.9710                                                                                                                       |                                                          |                                                                           |                                               | 0.7445                                                                    | 0.4882                                        |        |        |        |
|                                                                           |                                                                         |                   | CaPbCl <sub>4</sub><br><i>P2</i> <sub>1</sub> / <i>c</i> | $a = 14.1853$<br>$b = 6.6841$<br>$c = 7.7058$<br>$\beta = 92.50^\circ$  | 4e     | Cl3    | 0.1388                                                                    | 0.5043                                                                                                                       | 0.8751                                                   | BaPb <sub>2</sub> Cl <sub>6</sub><br><i>Aea</i> <sub>2</sub>              | 4a<br>8b                                      | Ba                                                                        | 0.0000                                        | 0.5000 | 0.3083 |        |
|                                                                           |                                                                         |                   |                                                          |                                                                         |        | Cl4    | 0.1320                                                                    | 0.3330                                                                                                                       | 0.5359                                                   |                                                                           |                                               | Pb                                                                        | 0.3243                                        | 0.5370 | 0.3897 |        |
| Cl5                                                                       | 0.1352                                                                  | 0.6539            |                                                          |                                                                         |        | 0.5312 | Cl1                                                                       | 0.9042                                                                                                                       | 0.8004                                                   |                                                                           |                                               | 0.1106                                                                    |                                               |        |        |        |
| Cl6                                                                       | 0.6663                                                                  | 0.1769            |                                                          |                                                                         |        | 0.8377 | Cl2                                                                       | 0.5717                                                                                                                       | 0.6779                                                   |                                                                           |                                               | 0.4821                                                                    |                                               |        |        |        |
| Ca <sub>2</sub> PbCl <sub>6</sub><br><i>P4</i> <sub>2</sub> / <i>mmn</i>  | $a = 6.5645$<br>$c = 12.8307$                                           | 4e                | Ca                                                       | 0.6206                                                                  | 0.5046 | 0.1677 | Ba <sub>2</sub> PbCl <sub>6</sub><br><i>Pbcn</i>                          | $a = 7.2661$<br>$b = 7.3548$<br>$c = 21.2620$                                                                                | 4c<br>8d                                                 | Cl3                                                                       | 0.2670                                        | 0.2419                                                                    | 0.6517                                        |        |        |        |
|                                                                           |                                                                         | 2a                | Pb                                                       | 0.8655                                                                  | 0.5200 | 0.8436 |                                                                           |                                                                                                                              |                                                          | Ba                                                                        | 0.5000                                        | 0.1539                                                                    | 0.7500                                        |        |        |        |
|                                                                           |                                                                         | 4f                | Cl1                                                      | 0.5468                                                                  | 0.2906 | 0.8784 |                                                                           |                                                                                                                              |                                                          | Pb                                                                        | 0.0366                                        | 0.2378                                                                    | 0.5741                                        |        |        |        |
|                                                                           |                                                                         | 8j                | Cl2                                                      | 0.7014                                                                  | 0.7725 | 0.9379 |                                                                           |                                                                                                                              |                                                          | Cl1                                                                       | 0.8216                                        | 0.3283                                                                    | 0.6782                                        |        |        |        |
| Cl3                                                                       | 0.7863                                                                  |                   | 0.1929                                                   | 0.6228                                                                  | Cl2    | 0.7446 |                                                                           |                                                                                                                              |                                                          | 0.0080                                                                    | 0.5176                                        |                                                                           |                                               |        |        |        |
| SrSn <sub>2</sub> Cl <sub>6</sub><br><i>Pc</i>                            | $a = 11.1152$<br>$b = 7.2045$<br>$c = 7.4450$<br>$\beta = 107.95^\circ$ | 2a                | Cl4                                                      | 0.0260                                                                  | 0.2630 | 0.9014 |                                                                           |                                                                                                                              |                                                          | Ba <sub>2</sub> PbCl <sub>6</sub><br><i>Pca</i> <sub>2</sub> <sub>1</sub> | $a = 7.3606$<br>$b = 21.7343$<br>$c = 7.3770$ | 4a                                                                        | Cl3                                           | 0.2670 | 0.2419 | 0.6517 |
|                                                                           |                                                                         |                   | Ca                                                       | 0.6206                                                                  | 0.5046 | 0.1677 |                                                                           |                                                                                                                              | Cl1                                                      |                                                                           |                                               |                                                                           | 0.3000                                        | 0.8501 | 0.9683 |        |
|                                                                           |                                                                         |                   | Pb                                                       | 0.8655                                                                  | 0.5200 | 0.8436 |                                                                           |                                                                                                                              | Cl2                                                      |                                                                           |                                               |                                                                           | 0.2408                                        | 0.0179 | 0.0086 |        |
|                                                                           |                                                                         |                   | Cl1                                                      | 0.5468                                                                  | 0.2906 | 0.8784 |                                                                           |                                                                                                                              | Cl3                                                      |                                                                           |                                               |                                                                           | 0.2490                                        | 0.6731 | 0.9253 |        |
|                                                                           |                                                                         |                   | Cl2                                                      | 0.7014                                                                  | 0.7725 | 0.9379 |                                                                           |                                                                                                                              | Cl4                                                      |                                                                           |                                               |                                                                           | 0.2489                                        | 0.5009 | 0.4323 |        |
|                                                                           |                                                                         |                   | Cl3                                                      | 0.7863                                                                  | 0.1929 | 0.6228 |                                                                           |                                                                                                                              | Cl5                                                      |                                                                           |                                               |                                                                           | 0.8340                                        | 0.8252 | 0.8330 |        |
|                                                                           |                                                                         |                   | SrSn <sub>2</sub> Cl <sub>6</sub><br><i>Pc</i>           | $a = 11.1152$<br>$b = 7.2045$<br>$c = 7.4450$<br>$\beta = 107.95^\circ$ | 2a     | Cl4    |                                                                           |                                                                                                                              | 0.0260                                                   | 0.2630                                                                    | 0.9014                                        | Ba <sub>2</sub> PbCl <sub>6</sub><br><i>Pca</i> <sub>2</sub> <sub>1</sub> | $a = 7.3606$<br>$b = 21.7343$<br>$c = 7.3770$ | 4a     | Cl6    | 0.7554 |
|                                                                           |                                                                         |                   |                                                          |                                                                         |        | Ca     | 0.6206                                                                    | 0.5046                                                                                                                       | 0.1677                                                   | Cl1                                                                       | 0.3000                                        |                                                                           |                                               |        | 0.8501 | 0.9683 |
|                                                                           |                                                                         |                   |                                                          |                                                                         |        | Pb     | 0.8655                                                                    | 0.5200                                                                                                                       | 0.8436                                                   | Cl2                                                                       | 0.2408                                        |                                                                           |                                               |        | 0.0179 | 0.0086 |
|                                                                           |                                                                         |                   |                                                          |                                                                         |        | Cl1    | 0.5468                                                                    | 0.2906                                                                                                                       | 0.8784                                                   | Cl3                                                                       | 0.2490                                        |                                                                           |                                               |        | 0.6731 | 0.9253 |
|                                                                           |                                                                         |                   |                                                          |                                                                         |        | Cl2    | 0.7014                                                                    | 0.7725                                                                                                                       | 0.9379                                                   | Cl4                                                                       | 0.2489                                        |                                                                           |                                               |        | 0.5009 | 0.4323 |
|                                                                           |                                                                         |                   |                                                          |                                                                         |        | Cl3    | 0.7863                                                                    | 0.1929                                                                                                                       | 0.6228                                                   | Cl5                                                                       | 0.8340                                        |                                                                           |                                               |        | 0.8252 | 0.8330 |

Table S3: Variations of the elastic moduli of  $\text{CaPb}_2\text{Cl}_6$  at 0 GPa.

| Elastic moduli | Young's modulus (GPa) |           | Linear compressibility ( $\text{TPa}^{-1}$ ) |               | Shear modulus (GPa) |           | Poisson's ratio |             |
|----------------|-----------------------|-----------|----------------------------------------------|---------------|---------------------|-----------|-----------------|-------------|
|                | $E_{min}$             | $E_{max}$ | $\beta_{min}$                                | $\beta_{max}$ | $G_{min}$           | $G_{max}$ | $\nu_{min}$     | $\nu_{max}$ |
| Value          | 4.5                   | 25.9      | -19.2                                        | 103.6         | 2.1                 | 8.0       | -0.06           | 1.18        |
| Anisotropy     | 5.7                   |           | -5.4                                         |               | 3.8                 |           | -21.6           |             |
| Axis           | 1.0                   | 0.0       | 0.0                                          | 1.0           | 0.7                 | 0.0       | -0.7            | 0.0         |
|                | 0.0                   | 1.0       | 0.0                                          | 0.0           | 0.0                 | 0.7       | 0.7             | 0.0         |
|                | 0.0                   | 0.0       | 1.0                                          | 0.0           | 0.7                 | 0.7       | 0.0             | 1.0         |
